# Supplementary material for: Group 4 initiators for the stereoselective ROP of rac-β-butyrolactone and its copolymerization with rac-lactide
Source: Royal Society of Chemistry journal article supplement (doi:10.1039/c1cc15265c), 2011-01-01
Supplement: c1cc15265c.pdf [file c1cc15265c.pdf]

## **Supporting Information**

### **Group 4 initiators for the stereoselective ROP of *rac*- $\beta$ -butyrolactone and its copolymerization with *rac*-lactide**

**Ben J. Jeffery, Emma L. Whitelaw, Daniel Garcia-Vivo, Joseph A. Stewart, Mary F. Mahon, Matthew G. Davidson\* and Matthew D. Jones\***

#### **Contents:**

|                                          |             |
|------------------------------------------|-------------|
| <b>1.1 Polymerization procedure</b>      | <b>2</b>    |
| <b>1.2 Kinetics procedure</b>            | <b>2</b>    |
| <b>1.3 Butyrolactone Polymerization</b>  | <b>2-5</b>  |
| <b>1.4 GPC</b>                           | <b>7</b>    |
| <b>1.5 Ligand and Complex Synthesis:</b> | <b>7-10</b> |

## 1.1 Polymerization procedure

For solution polymerizations of *rac*-lactide the monomer:initiator ratio employed was 100:1 at a temperature of 80 °C, in all cases the solvent was toluene and 0.7 g of *rac*-lactide was used. After the reaction time, methanol was added to quench the reaction and any resulting solid dissolved in dichloromethane. The solvents were removed *in-vacuo* and the resulting solid was washed with copious amounts of methanol to remove any unreacted monomer. <sup>1</sup>H NMR spectroscopy (CDCl<sub>3</sub>) and GPC (THF) were used to determine tacticity and molecular weights (*M<sub>n</sub>* and *M<sub>w</sub>*) of the polymers produced; *P<sub>r</sub>* (the probability of heterotactic linkages) were determined by analysis of the methine region of the homonuclear decoupled <sup>1</sup>H NMR spectra.

## 1.2 Kinetics procedure

A 0.6 ml solution of *rac*-lactide in d<sub>8</sub>-toluene was prepared with an initial concentration of 0.578 mol dm<sup>-3</sup> based on 0.05 g of *rac*-lactide in a monomer to initiator ratio of 100:1 using {Hf(2)O<sup>i</sup>Pr}<sub>2</sub>, {Hf(4)O<sup>i</sup>Pr}<sub>2</sub>, {Zr(2)O<sup>i</sup>Pr}<sub>2</sub>, {Zr(4)O<sup>i</sup>Pr}<sub>2</sub>, as the initiators. The <sup>1</sup>H NMR spectra of the sample was obtained at 80 °C over a period of 13 hours at 15 minute intervals. The relative concentrations of the monomer and polymer were determined from analysis of the <sup>1</sup>H NMR spectra and ln[A<sub>0</sub>]/[A<sub>t</sub>] vs time plotted.

## 1.3 Butyrolactone Polymerization

### *General Procedure for BBL polymerization 300:1*

BBL (1.0 g, 11.6 mmol) and {Hf(2)O<sup>i</sup>Pr}<sub>2</sub> catalyst (30 mg, 38 μmol) were dissolved in toluene (1.0 ml) and heated in a sealed vessel at 80 °C for 24 hours. The reaction was cooled to RT and quenched with MeOH (~1 ml) and CH<sub>2</sub>Cl<sub>2</sub> (~5 ml). Solvent was removed and resulting solid dried under vacuum. The solid was dissolved in minimal CH<sub>2</sub>Cl<sub>2</sub> and precipitated with MeOH. The precipitate was filtered and dried under vacuum.

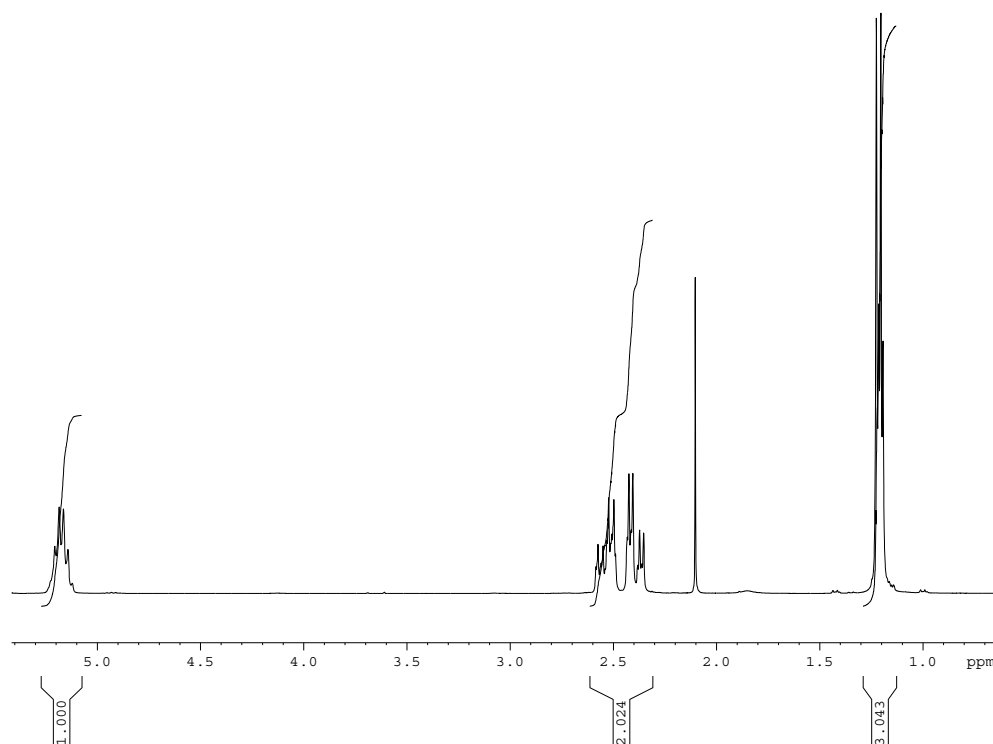

**Figure 1:** <sup>1</sup>H NMR (300MHz, CDCl<sub>3</sub>) of PHB from {Hf(2)O<sup>i</sup>Pr}<sub>2</sub> at 80 °C

### **General Procedure for copolymerization of BBL:LA 150:150:1**

BBL (0.37 g, 4.3 mmol), *rac*-LA (625mg, 4.3mmol) and  $\{\text{Hf}(\text{2})\text{O}^i\text{Pr}\}_2$  catalyst (22 mg, 28  $\mu\text{mol}$ ) were dissolved in toluene (1.0 ml) and heated in a sealed vessel at 80 °C for 24 hours. The reaction was cooled to RT and quenched with MeOH (~1 ml) and  $\text{CH}_2\text{Cl}_2$  (~5 ml). Solvent was removed and resulting solid dried under vacuum. The solid was dissolved in minimal  $\text{CH}_2\text{Cl}_2$  and precipitated with MeOH. The precipitate was filtered and dried under vacuum.

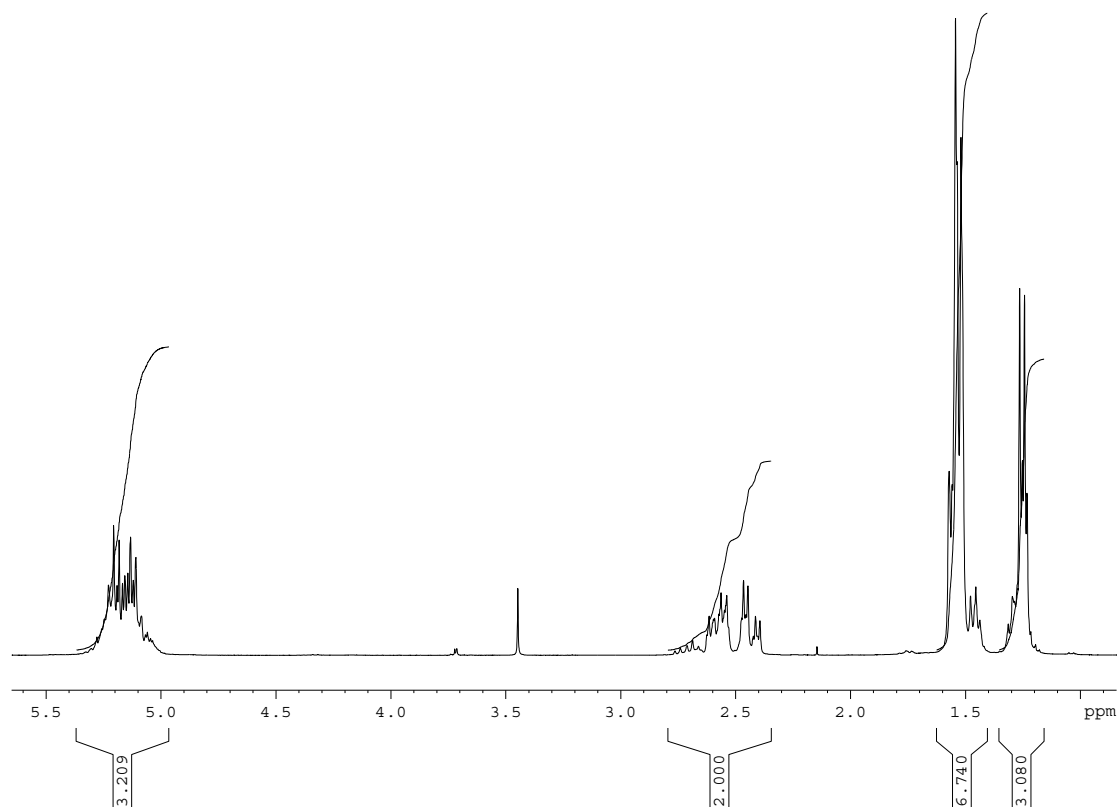

**Figure 2**  $^1\text{H}$  NMR (300MHz,  $\text{CDCl}_3$ ) of PHB-*b*-PLA from  $\{\text{Hf}(\text{2})\text{O}^i\text{Pr}\}_2$  at 80 °C

### **Determination of Tacticity**

The tacticity was determined by deconvolution of carbonyl signal of the  $^{13}\text{C}\{^1\text{H}\}$  NMR spectrum (300 MHz in  $\text{CDCl}_3$ ).

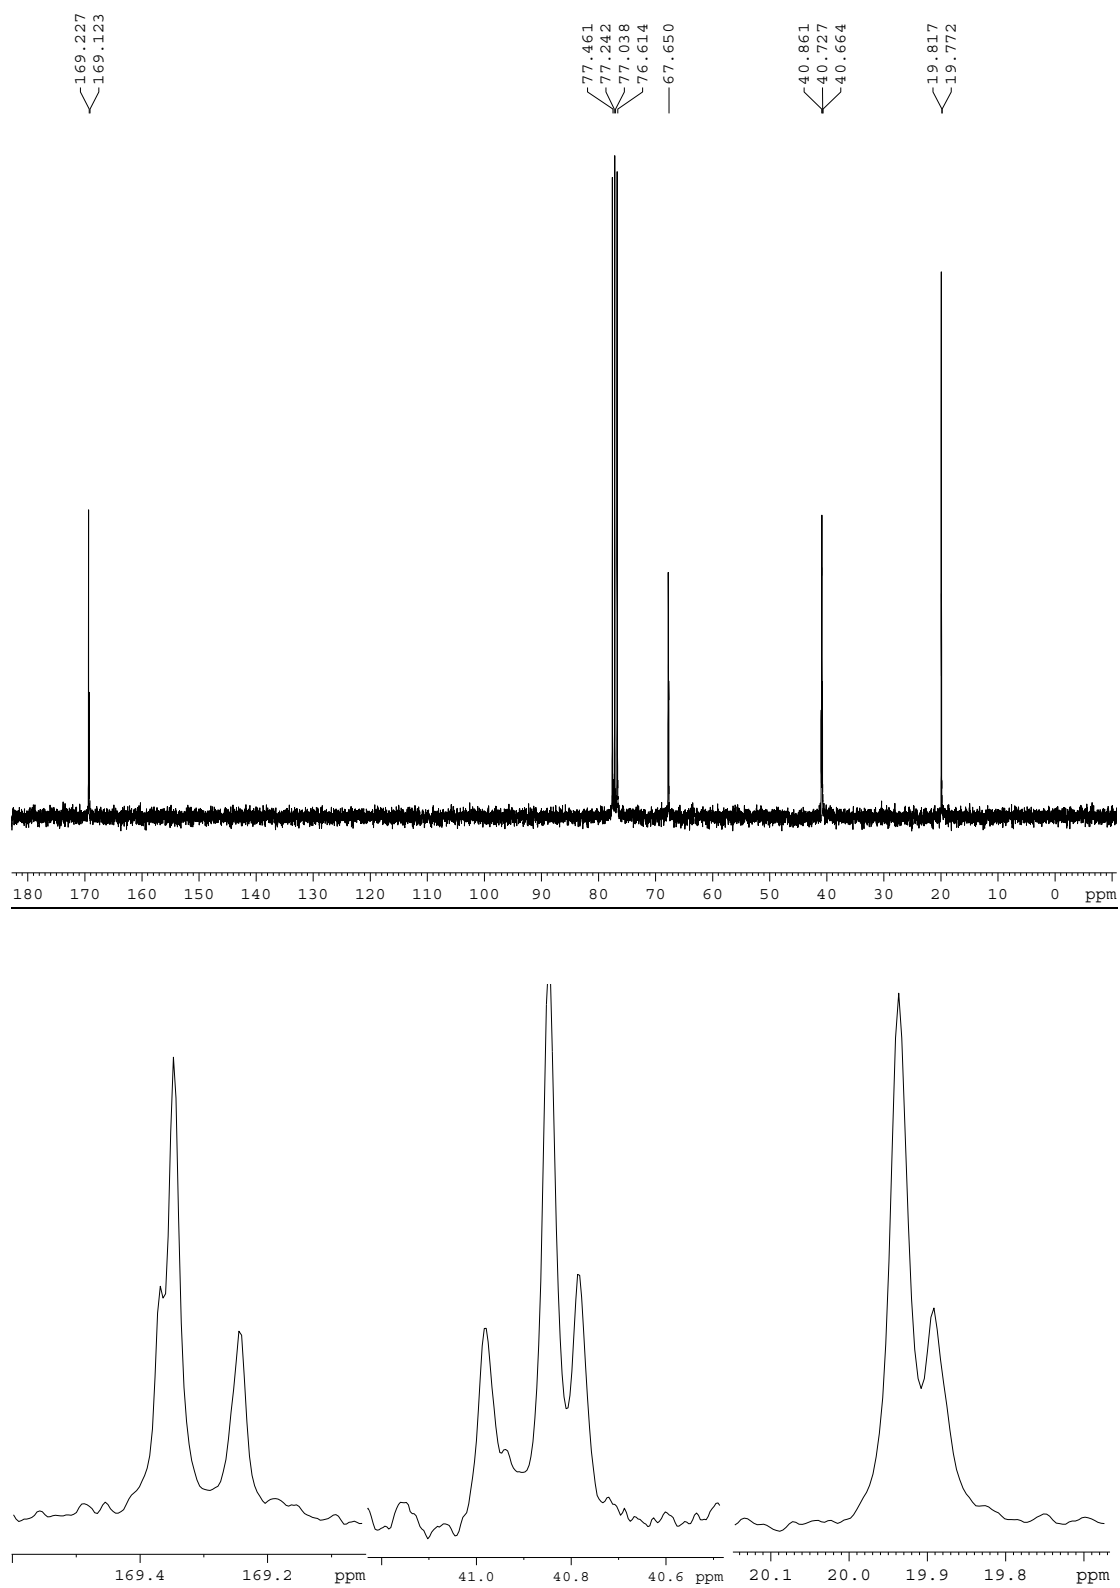

**Figure 3**  $^{13}\text{C}\{^1\text{H}\}$  NMR (300MHz,  $\text{CDCl}_3$ ) of PHB from  $\{\text{Hf}(2)\text{O}^i\text{Pr}\}_2$  at 40 °C

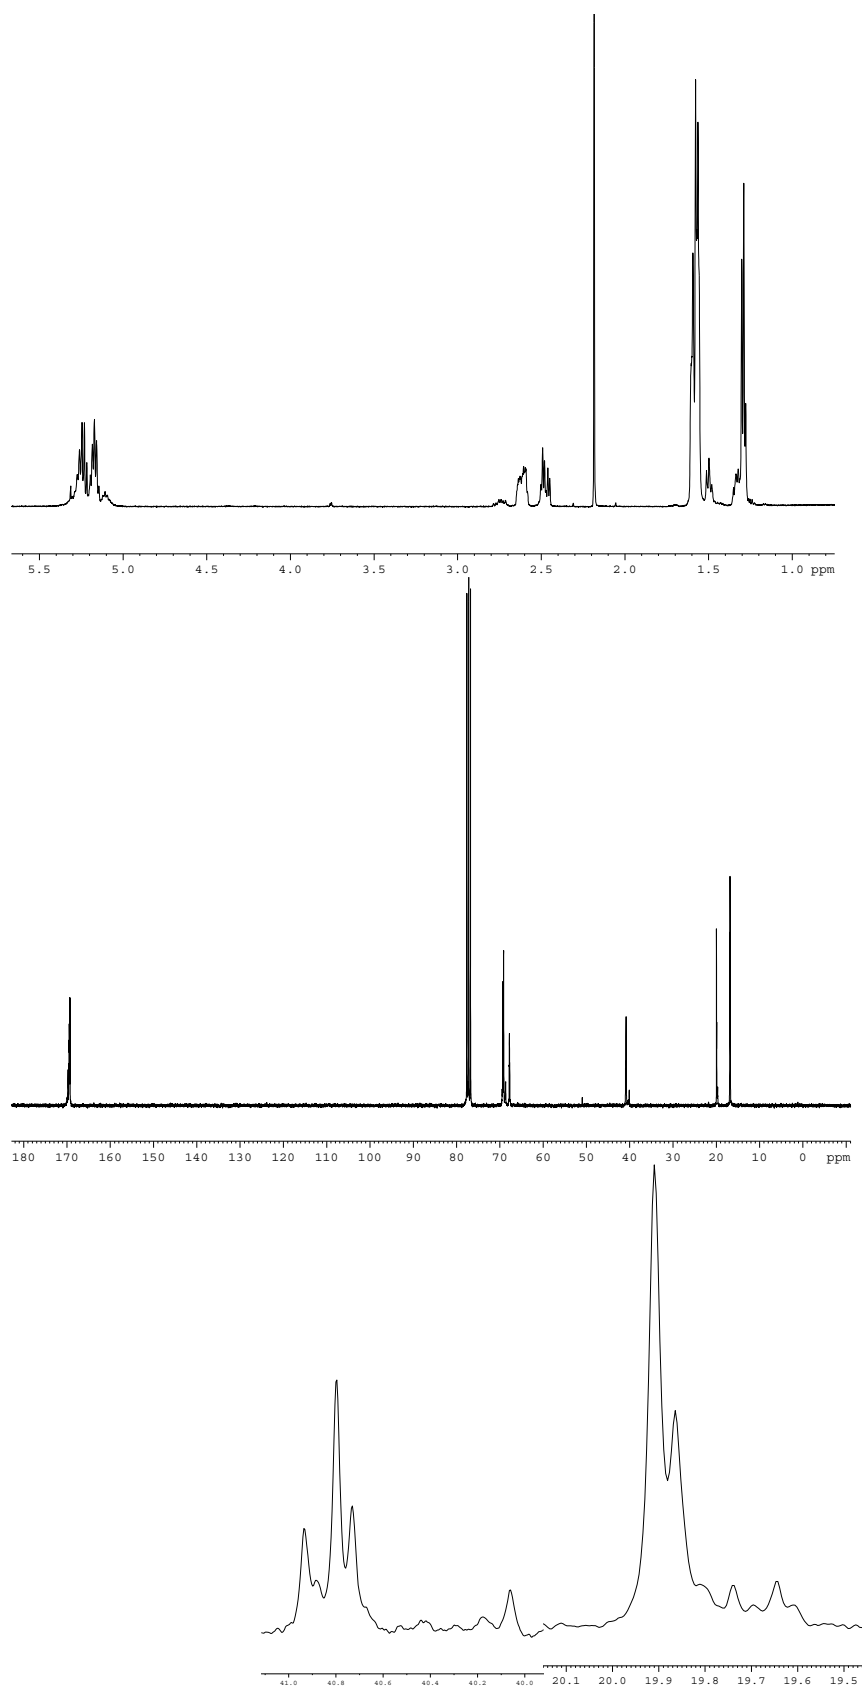

**Figure 4**  $^{13}\text{C}\{^1\text{H}\}$  and  $^1\text{H}$  NMR (500MHz,  $\text{CDCl}_3$ ) for PLA-*b*-PHB

## 1.4 GPC

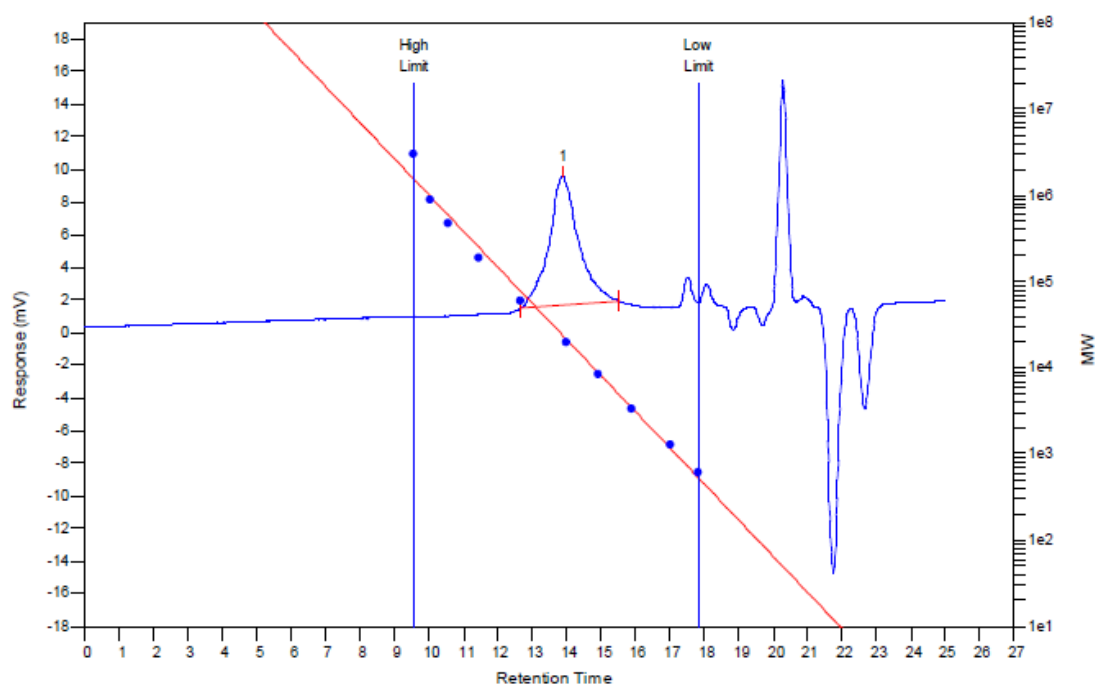

**Figure 5**  $\{\text{Hf}(\text{2})\text{O}^i\text{Pr}\}_2$  solution polymerisation for 24 hours at 80 °C

### 1.5 Ligand and Complex Synthesis:

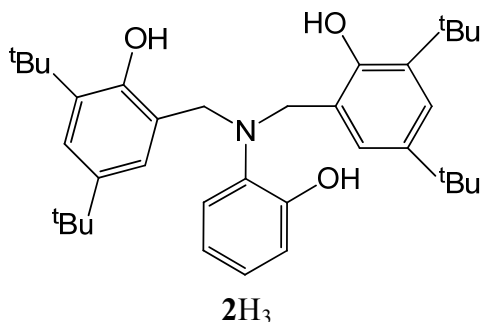

2-hydroxyaniline (1 g, 9.16 mmol) was dissolved in THF (20 cm<sup>3</sup>), to which a solution of 3,5-di-tert-2-hydroxybenzyl bromide (5.49 g, 18.35 mmol) in THF (20 cm<sup>3</sup>) was added. Triethylamine (1.86 g, 3 ml, 18.35 mmol) was added and the mixture stirred at 80 °C for three hours. The precipitate was filtered and the solvent removed under reduced pressure. The product was isolated *via* flash chromatography (CH<sub>2</sub>Cl<sub>2</sub>) to obtain the product (3.82 g, 76 %). <sup>1</sup>H NMR (CDCl<sub>3</sub>) 1.28 (18H, s, C(CH<sub>3</sub>)<sub>3</sub>), 1.40 (18H, s, C(CH<sub>3</sub>)<sub>3</sub>), 4.14 (4H, s, CH<sub>2</sub>), 6.82 – 6.87 (2H, m, Ar-H), 6.97 (3H, d J = 2.5 Hz, Ar-H), 7.20 (2H, d J = 2.5 Hz, Ar-H) and 7.24 (1H, d J = 1.5 Hz, Ar-H). <sup>13</sup>C{<sup>1</sup>H} NMR (CDCl<sub>3</sub>) 29.8, 31.6 (C(CH<sub>3</sub>)<sub>3</sub>), 34.1, 34.6 (C(CH<sub>3</sub>)<sub>3</sub>), 56.4 (CH<sub>2</sub>), 114.7, 116.1, 120.6 (Ar-CH), 121.8 (Ar-C), 122.1, 123.5, 125.8 (Ar-CH), 135.5, 135.6, 141.7 (Ar-C), 151.3, 152.1 (Ar-O). m/z calc. C<sub>36</sub>H<sub>51</sub>NO<sub>3</sub><sup>+</sup> 546.3947, found 546.3985

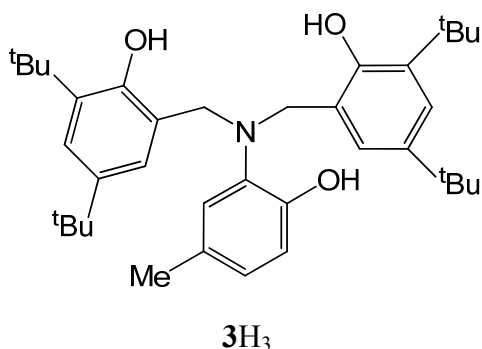

2-amino-*p*-cresol (1 g, 8.12 mmol) was dissolved in THF (20 cm<sup>3</sup>), to which a solution of 3,5-di-tert-2-hydroxybenzyl bromide (4.84 g, 16.17 mmol) in THF (20 cm<sup>3</sup>) was added. Triethylamine (1.64 g, 2.5 ml, 16.17 mmol) was added and the mixture stirred at 80 °C for three hours. The precipitate was filtered and the solvent removed under reduced pressure. The product was isolated *via* flash chromatography (CH<sub>2</sub>Cl<sub>2</sub>) to obtain the product (3.46 g, 76 %). <sup>1</sup>H NMR (CDCl<sub>3</sub>) 1.29 (18H, s, C(CH<sub>3</sub>)<sub>3</sub>), 1.40 (18H, s, C(CH<sub>3</sub>)<sub>3</sub>), 2.23 (3H, s, CH<sub>3</sub>), 4.13 (4H, s, CH<sub>2</sub>), 6.74 (2H, dd J = 4.5 Hz, 1.5 Hz, Ar-H), 7.00 (2H, d J = 2.5 Hz, Ar-H), 7.04 (1H, d J = 1.5 Hz, Ar-H) and 7.20 (2H, d J = 2.5 Hz, Ar-H). <sup>13</sup>C{<sup>1</sup>H} NMR (CDCl<sub>3</sub>) 20.7 (CH<sub>3</sub>), 29.7, 31.6 (C(CH<sub>3</sub>)<sub>3</sub>), 34.1, 34.6 (C(CH<sub>3</sub>)<sub>3</sub>), 56.3 (CH<sub>2</sub>), 114.6, 115.7, 120.7 (Ar-CH), 121.7 (Ar-C), 123.4, 125.8 (Ar-CH), 129.8, 135.2, 135.6, 141.5 (Ar-C), 148.6, 152.2 (Ar-O). m/z calc. C<sub>37</sub>H<sub>53</sub>NO<sub>3</sub>Na 582.3923, found 582.3913.

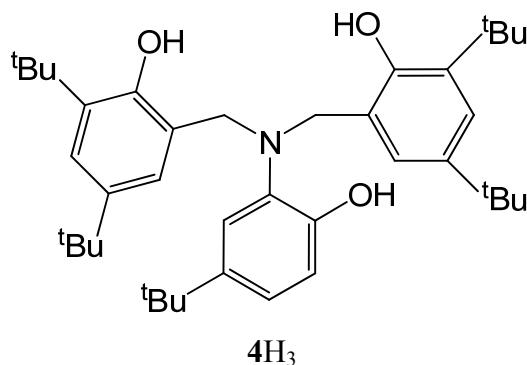

2-amino-4-*tert*-butylphenol (1 g, 8.12 mmol) was dissolved in THF (20 cm<sup>3</sup>), to which a solution of 3,5-di-*tert*-2-hydroxybenzyl bromide (3.62 g, 12.10 mmol) in THF (20 cm<sup>3</sup>) was added. Triethylamine (1.23 g, 2.0 ml, 12.10 mmol) was added and the mixture stirred at 80 °C for three hours. The precipitate was filtered and the solvent removed under reduced pressure. The product was isolated *via* flash chromatography (CH<sub>2</sub>Cl<sub>2</sub>) to obtain the product (2.12 g, 58 %). <sup>1</sup>H NMR (CDCl<sub>3</sub>) 1.28 (9H, s, C(CH<sub>3</sub>)<sub>3</sub>), 1.30 (18H, s, C(CH<sub>3</sub>)<sub>3</sub>), 1.42 (18H, s, C(CH<sub>3</sub>)<sub>3</sub>), 4.19 (4H, s, CH<sub>2</sub>), 6.79 (1H, d J = 8.5 Hz, Ar-H), 6.99 (1H, d J = 8.5 Hz, Ar-H), 7.03 (2H, d J = 1.5 Hz, Ar-H), 7.22 (2H, d J = 1.5 Hz, Ar-H), 7.31 (1H, s, Ar-H). <sup>13</sup>C{<sup>1</sup>H} NMR (CDCl<sub>3</sub>) 29.8, 31.5, 31.6 (C(CH<sub>3</sub>)<sub>3</sub>), 34.1, 34.3, 34.6 (C(CH<sub>3</sub>)<sub>3</sub>), 56.4 (CH<sub>2</sub>), 115.3, 119.2, (Ar-CH), 121.8 (Ar-C), 122.2, 123.5, 125.6 (Ar-CH), 134.7, 135.6, 141.5, 143.3 (Ar-C), 148.5, 152.2 (Ar-O). m/z calc. C<sub>40</sub>H<sub>50</sub>NO<sub>3</sub><sup>+</sup> = 602.4573, found 602.4620

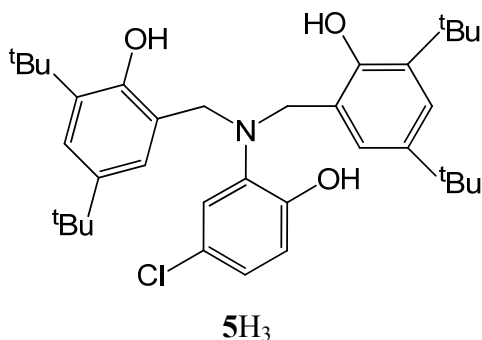

2-amino-4-chlorophenol (1 g, 6.97 mmol) was dissolved in THF (20 cm<sup>3</sup>), to which a solution of 3,5-di-*tert*-2-hydroxybenzyl bromide (4.17 g, 13.94 mmol) in THF (20 cm<sup>3</sup>) was added. Triethylamine (1.41 g, 2.0 ml, 13.94 mmol) was added and the mixture stirred at 80 °C for three hours. The precipitate was filtered and the solvent removed under reduced pressure. The product was isolated *via* flash chromatography (CH<sub>2</sub>Cl<sub>2</sub>) to obtain the product (2.30 g, 57 %). <sup>1</sup>H NMR (CDCl<sub>3</sub>) 1.30 (18H, s, C(CH<sub>3</sub>)<sub>3</sub>), 1.41 (18H, s, C(CH<sub>3</sub>)<sub>3</sub>), 4.12 (4H, s, CH<sub>2</sub>), 6.76 (1H, d J = 8.5 Hz, Ar-H), 6.91 (1H, dd J = 8.5 Hz, 2.5 Hz, Ar-H), 7.01 (2H, d J = 2.5 Hz, Ar-H), 7.20 (1H, d J = 2.5 Hz, Ar-H), 7.22 (2H, d J = 2.5 Hz, Ar-H). <sup>13</sup>C{<sup>1</sup>H} NMR (CDCl<sub>3</sub>) 29.7, 31.6 (C(CH<sub>3</sub>)<sub>3</sub>), 34.1, 34.6 (C(CH<sub>3</sub>)<sub>3</sub>), 56.1 (CH<sub>2</sub>), 116.8, (Ar-CH), 121.4 (Ar-C), 122.7, 123.6 (Ar-CH), 124.9 (Ar-C), 125.3, 126.0 (Ar-CH) 135.6, 136.6, 141.8 (Ar-C), 150.0, 152.0 (Ar-O). m/z calc. C<sub>36</sub>H<sub>50</sub>NO<sub>3</sub>Cl<sup>+</sup> = 580.3557, found 580.3523.

{Hf(2)(O<sup>i</sup>Pr)<sub>2</sub> Hf(O<sup>i</sup>Pr)<sub>4</sub>.<sup>i</sup>PrOH (0.5 g, 1.05 mmol) was dissolved in toluene (20 cm<sup>3</sup>) to which 2H<sub>3</sub> (0.57 g, 1.05 mmol) was added. The solution was stirred for 2 hours, after which time the solvent was removed *in-vacuo* and the product was recrystallised in hexane. After 4 days at -20 °C a crop of crystals were obtained which were filtered and dried. <sup>1</sup>H (d<sub>8</sub>-THF) 1.20 (36H, s, C(CH<sub>3</sub>)<sub>3</sub>), 1.38 (12H, d J = 6 Hz, CH<sub>3</sub> isopropoxide), 1.48 (36H, s, C(CH<sub>3</sub>)<sub>3</sub>), 3.82 (4H, br s, CH<sub>2</sub>), 4.12 (4H, d J = 12.5 Hz, CH<sub>2</sub>), 4.67 (2H, sept J = 6 Hz, CH isopropoxide), 6.33 (2H, dd J = 1.5 Hz, 8.0 Hz, Ar-H), 6.62 (2H, td J = 1.5 Hz, 8.0 Hz, Ar-H), 6.84 (4H, td J = 1.5 Hz, 8.0 Hz, Ar-H), 7.13 – 7.19 (6H, m, Ar-H), 7.47 (2H, dd J = 1.5 Hz, 8.0 Hz, Ar-H). <sup>13</sup>C{<sup>1</sup>H} (d<sub>8</sub>-THF) 28.3 (CH<sub>3</sub> isopropoxide), 32.2 (C(CH<sub>3</sub>)<sub>3</sub>), 34.7, 35.7 (C(CH<sub>3</sub>)<sub>3</sub>), 60.0 (CH<sub>2</sub>), 72.4 (CH isopropoxide), 118.2, 119.0, 123.9 (Ar-CH), 125.1 (Ar-C), 126.3,



129.1, 129.7 (Ar-CH), 137.1, 140.2, 140.4 (Ar-C), 132.8, 163.0 (Ar-O). Anal: Calc for  $C_{39}H_{55}NO_4Hf$  C, 60.03; H, 7.10; N, 1.79. Found: C, 60.7; H, 7.41; N, 1.69.

$\{Hf(3)O^iPr\}_2 Hf(O^iPr)_4 \cdot iPrOH$  (0.5 g, 1.05 mmol) was dissolved in toluene (20 cm<sup>3</sup>) to which  $3H_3$  (0.59 g, 1.05 mmol) was added. The solution was stirred for 2 hours, after which time the solvent was removed *in-vacuo* and the product was recrystallised in hexane. After 7 days at -20 °C a crop of crystals were obtained which were filtered and dried. <sup>1</sup>H (d<sub>8</sub>-THF) 1.20 (36H, s, C(CH<sub>3</sub>)<sub>3</sub>), 1.37 (12H, d J = 6 Hz, CH<sub>3</sub> isopropoxide), 1.48 (36H, s, C(CH<sub>3</sub>)<sub>3</sub>), 2.23 (3H, s, CH<sub>3</sub>), 3.84 (4H, br s, CH<sub>2</sub>), 4.10 (4H, d J = 12.5 Hz, CH<sub>2</sub>), 4.66 (2H, sept J = 6.0 Hz, CH isopropoxide), 6.21 (2H, d J = 8.0 Hz, Ar-H), 6.62 (2H, dd J = 2.0 Hz, 8.5 Hz, Ar-H), 6.77 – 6.95 (4H, m, Ar-H), 7.14 – 7.23 (4H, m, Ar-H), 7.28 (2H, d J = 2.0 Hz, Ar-H). <sup>13</sup>C{<sup>1</sup>H} (d<sub>8</sub>-THF) 20.9 (CH<sub>3</sub>), 29.4 (CH<sub>3</sub> isopropoxide), 32.3 (C(CH<sub>3</sub>)<sub>3</sub>), 34.8, 35.8 (C(CH<sub>3</sub>)<sub>3</sub>), 63.8 (CH<sub>2</sub>), 72.4 (CH isopropoxide), 118.6, 123.9, 124.2 (Ar-CH), 125.3 (Ar-C), 126.4, 129.7 (Ar-CH), 137.2, 139.9, 140.2 (Ar-C), 158.6, 160.7 (Ar-O). Anal: Calc for  $C_{40}H_{57}NO_4Hf$  C, 60.48; H, 7.23; N, 1.76. Found: C, 59.4; H, 7.17; N, 1.74.

$\{Hf(4)O^iPr\}_2 Hf(O^iPr)_4 \cdot iPrOH$  (0.5 g, 1.05 mmol) was dissolved in toluene (20 cm<sup>3</sup>) to which  $4H_3$  (0.63 g, 1.05 mmol) was added. The solution was stirred for 2 hours, after which time the solvent was removed *in-vacuo* and the product was recrystallised in hexane. After 2 days at -20 °C a crop of crystals were obtained which were filtered and dried. <sup>1</sup>H (d<sub>8</sub>-THF) 1.20 (18H, s, C(CH<sub>3</sub>)<sub>3</sub>), 1.30 (36H, s, C(CH<sub>3</sub>)<sub>3</sub>), 1.37 (12H, d J = 6 Hz, CH<sub>3</sub> isopropoxide), 1.47 (36H, s, C(CH<sub>3</sub>)<sub>3</sub>), 3.90 (4H, br s, CH<sub>2</sub>), 4.11 (4H, d J = 12.5 Hz, CH<sub>2</sub>), 4.66 (2H, sept J = 6 Hz, CH isopropoxide), 6.26 (2H, d J = 8.5 Hz, Ar-H), 6.90 (4H, dd J = 2.0 Hz, 8.5 Hz, Ar-H), 7.04 – 7.29 (6H, m, Ar-H), 7.46 (2H, d J = 2.0 Hz, Ar-H). <sup>13</sup>C{<sup>1</sup>H} (d<sub>8</sub>-THF) 26.1 (CH<sub>3</sub> isopropoxide), 32.3, 32.4 (C(CH<sub>3</sub>)<sub>3</sub>), 34.8, 35.0, 35.8 (C(CH<sub>3</sub>)<sub>3</sub>), 64.6 (CH<sub>2</sub>), 72.4 (CH isopropoxide), 118.2, 120.5, 124.0 (Ar-CH), 125.3 (Ar-C), 125.9, 126.3 (Ar-CH), 135.0, 137.2, 139.5, 141.1 (Ar-C), 158.7, 160.6 (Ar-O). Anal: Calc for  $C_{43}H_{63}NO_4Hf$  C, 61.74; H, 7.59; N, 1.67. Found: C, 60.3; H, 7.83; N, 1.52.

$\{Hf(5)O^iPr\}_2 Hf(O^iPr)_4 \cdot iPrOH$  (0.5 g, 1.05 mmol) was dissolved in toluene (20 cm<sup>3</sup>) to which  $5H_3$  (0.61 g, 1.05 mmol) was added. The solution was stirred for 2 hours, after which time the solvent was removed *in-vacuo* and the product was recrystallised in hexane. After 20 days at -20 °C a crop of crystals were obtained which were filtered and dried. <sup>1</sup>H (d<sub>8</sub>-THF) 1.08 (12H, d J = 6 Hz, CH<sub>3</sub> isopropoxide), 1.21 (36H, s, C(CH<sub>3</sub>)<sub>3</sub>), 1.37 (12H, d J = 6 Hz, CH<sub>3</sub> isopropoxide), 1.47 (36H, s, C(CH<sub>3</sub>)<sub>3</sub>), 3.84 (4H, br s, CH<sub>2</sub>), 4.11 (4H, dd J = 6.5 Hz, 12.5 Hz, CH<sub>2</sub>), 4.65 (2H, sept J = 6 Hz, CH isopropoxide), 6.28 (2H, dd J = 2.5 Hz, 8.5 Hz, Ar-H), 6.84 (4H, td J = 2.5 Hz, 8.5 Hz, Ar-H), 7.15 – 7.23 (4H, m, Ar-H), 7.53 (2H, d J = 2.5 Hz, Ar-H), 7.59 (2H, d J = 2.5 Hz, Ar-H). <sup>13</sup>C{<sup>1</sup>H} (d<sub>8</sub>-THF) 26.1 (CH<sub>3</sub> isopropoxide), 28.2, 30.8 (C(CH<sub>3</sub>)<sub>3</sub>), 32.2, 32.3 (C(CH<sub>3</sub>)<sub>3</sub>), 34.8, 35.8 (C(CH<sub>3</sub>)<sub>3</sub>), 61.9 (CH<sub>2</sub>), 72.6 (CH isopropoxide), 119.9 (Ar-CH), 122.5, 123.0 (Ar-C), 124.1, 124.9 (Ar-CH), 125.0 (Ar-C), 126.5, 129.1 (Ar-CH), 137.4, 140.5 (Ar-C), 162.1, 162.3 (Ar-O). Anal: Calc for  $C_{39}H_{54}NO_4Cl_1Hf$  C, 57.49; H, 6.67; N, 1.72. Found: C, 57.6; H, 6.77; N, 1.70.

## 1.6 NMR of complexes

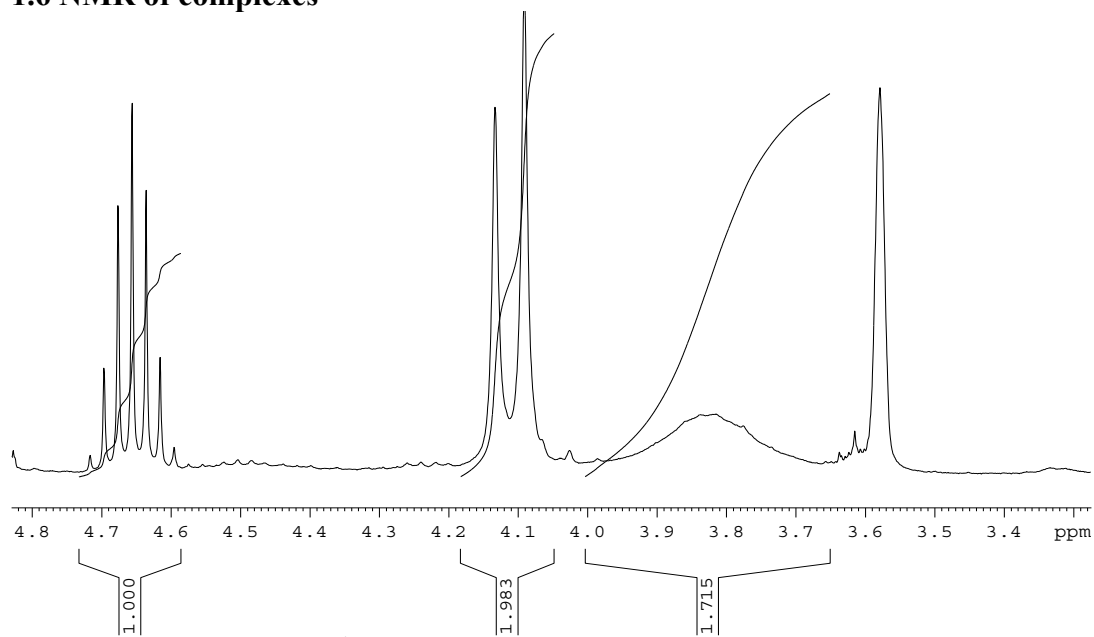

**Figure 6:**  $^1\text{H}$  NMR of  $\{\text{Hf}(\mathbf{2})\text{O}^i\text{Pr}\}_2$  at room temperature in  $d_8$ -THF showing fluxionality

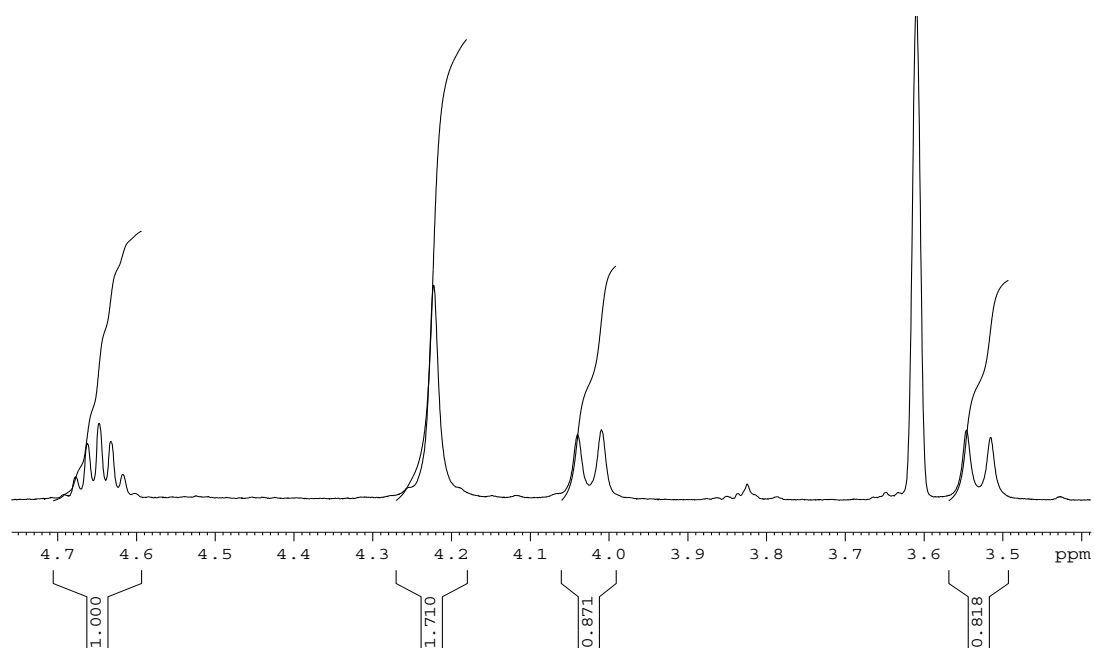

**Figure 7:**  $^1\text{H}$  NMR of  $\{\text{Hf}(\mathbf{2})\text{O}^i\text{Pr}\}_2$  at 230 K in  $d_8$ -THF showing that the complex has been isolated in its monomeric form at low temperature with the possibility of a THF molecule coordinated to the metal centre differentiating all protons of the  $\text{CH}_2$  groups to be inequivalent.

The investigation of variable temperature shows that with the bulkier ligand with a  $^t\text{Bu}$  at the para position to the oxygen on the amine phenyl ring differentiates all protons into 4 doublets at 233 K indicating that all the protons are in different environments. However, with the less sterically bulky ligand with a H at the para position to the oxygen on the amine phenyl ring, at low temperature, two protons are still seen as equivalent, and the other two are inequivalent shown by a singlet and two doublets.
